# Supplementary material for: Assessing the Reliability of Optimized Residual Feed Intake Measurements in Beef Cattle
Source: MDPI journal article supplement (doi:10.3390/ruminants2040028), 2022-10-31
Supplement: s1 [file s1]

Archive with 1 entries (1 files):
- ruminants-1957680-supplementary.pdf
