# Supplementary material for: Assessing the Reliability of Optimized Residual Feed Intake Measurements in Beef Cattle
Source: MDPI journal article supplement (doi:10.3390/ruminants2040028), 2022-10-31
Supplement: s1 [file s1 › ruminants-1957680-supplementary.pdf]

**Table S1.** The transition matrix between lowest, middle, and highest thirds in residual eating derived from experiment 2. The percentage of transitions between the thirds has been calculated using a non-parametric bootstrap approach to get realistic estimates for the transitions between the lowest and highest thirds, which were not observed for most measurement standards in the experiment.

|               |      |      |      |               |      |      |      |      |
|---------------|------|------|------|---------------|------|------|------|------|
| Gold standard | S2   |      |      | Gold standard | S3   |      |      |      |
|               | 1st  | 2nd  | 3rd  |               | 1st  | 2nd  | 3rd  |      |
|               | 1st  | 92 % | 8 %  |               | 0 %  | 89 % | 11 % | 0 %  |
|               | 2nd  | 8 %  | 84 % |               | 8 %  | 11 % | 81 % | 8 %  |
|               | 3rd  | 0 %  | 8 %  |               | 92 % | 0 %  | 8 %  | 92 % |
|               | S4   |      |      |               | S5   |      |      |      |
|               | 1st  | 2nd  | 3rd  |               | 1st  | 2nd  | 3rd  |      |
|               | 1st  | 81 % | 17 % |               | 2 %  | 78 % | 19 % | 3 %  |
|               | 2nd  | 19 % | 67 % |               | 15 % | 22 % | 61 % | 17 % |
|               | 3rd  | 0 %  | 16 % |               | 84 % | 0 %  | 19 % | 80 % |
| S6/S12        |      |      | S7   |               |      |      |      |      |
| 1st           | 2nd  | 3rd  | 1st  | 2nd           | 3rd  |      |      |      |
| 1st           | 76 % | 21 % | 3 %  | 74 %          | 22 % | 4 %  |      |      |
| 2nd           | 23 % | 58 % | 20 % | 19 %          | 60 % | 20 % |      |      |
| 3rd           | 2 %  | 21 % | 77 % | 7 %           | 17 % | 76 % |      |      |
| S8            |      |      | S9   |               |      |      |      |      |
| 1st           | 2nd  | 3rd  | 1st  | 2nd           | 3rd  |      |      |      |
| 1st           | 79 % | 21 % | 1 %  | 74 %          | 23 % | 3 %  |      |      |
| 2nd           | 21 % | 65 % | 14 % | 20 %          | 60 % | 20 % |      |      |
| 3rd           | 0 %  | 15 % | 85 % | 7 %           | 16 % | 77 % |      |      |
| S10/S13       |      |      | S11  |               |      |      |      |      |
| 1st           | 2nd  | 3rd  | 1st  | 2nd           | 3rd  |      |      |      |
| 1st           | 73 % | 25 % | 2 %  | 79 %          | 18 % | 3 %  |      |      |
| 2nd           | 27 % | 54 % | 19 % | 16 %          | 58 % | 26 % |      |      |
| 3rd           | 1 %  | 21 % | 79 % | 5 %           | 25 % | 70 % |      |      |
| S14           |      |      | S15  |               |      |      |      |      |
| 1st           | 2nd  | 3rd  | 1st  | 2nd           | 3rd  |      |      |      |
| 1st           | 77 % | 20 % | 3 %  | 78 %          | 19 % | 4 %  |      |      |
| 2nd           | 22 % | 61 % | 16 % | 22 %          | 60 % | 18 % |      |      |

|            |     |      |      |            |     |      |      |
|------------|-----|------|------|------------|-----|------|------|
| <b>3rd</b> | 0 % | 19 % | 81 % | <b>3rd</b> | 0 % | 21 % | 78 % |
|------------|-----|------|------|------------|-----|------|------|

**Table S2.** The transition matrix between lowest, middle, and highest thirds in residual eating derived from experiment 3. The percentage of transitions between the thirds has been calculated using non-parametric bootstrap approach to get realistic estimates for the transitions between the lowest and highest thirds, which were not observed for most measurement standards in the experiment.

|               |      |      |      |               |      |      |      |      |      |
|---------------|------|------|------|---------------|------|------|------|------|------|
| Gold standard | S2   |      |      | Gold standard | S3   |      |      |      |      |
|               | 1st  | 2nd  | 3rd  |               | 1st  | 2nd  | 3rd  |      |      |
|               | 1st  | 95 % | 5 %  |               | 0 %  | 1st  | 94 % | 6 %  | 0 %  |
|               | 2nd  | 5 %  | 87 % |               | 8 %  | 2nd  | 6 %  | 83 % | 11 % |
|               | 3rd  | 0 %  | 8 %  |               | 92 % | 3rd  | 0 %  | 11 % | 89 % |
|               | S4   |      |      |               | S5   |      |      |      |      |
|               | 1st  | 2nd  | 3rd  |               | 1st  | 2nd  | 3rd  |      |      |
|               | 1st  | 53 % | 42 % |               | 4 %  | 1st  | 84 % | 16 % | 0 %  |
|               | 2nd  | 30 % | 43 % |               | 28 % | 2nd  | 16 % | 72 % | 12 % |
|               | 3rd  | 16 % | 15 % |               | 69 % | 3rd  | 0 %  | 12 % | 88 % |
| S6/S12        |      |      | S7   |               |      |      |      |      |      |
| 1st           | 2nd  | 3rd  | 1st  | 2nd           | 3rd  |      |      |      |      |
| 1st           | 64 % | 31 % | 4 %  | 1st           | 68 % | 19 % | 13 % |      |      |
| 2nd           | 29 % | 43 % | 28 % | 2nd           | 23 % | 46 % | 31 % |      |      |
| 3rd           | 7 %  | 25 % | 68 % | 3rd           | 9 %  | 34 % | 57 % |      |      |
| S8            |      |      | S9   |               |      |      |      |      |      |
| 1st           | 2nd  | 3rd  | 1st  | 2nd           | 3rd  |      |      |      |      |
| 1st           | 59 % | 37 % | 4 %  | 1st           | 91 % | 9 %  | 0 %  |      |      |
| 2nd           | 27 % | 49 % | 24 % | 2nd           | 9 %  | 83 % | 8 %  |      |      |
| 3rd           | 14 % | 14 % | 73 % | 3rd           | 0 %  | 8 %  | 92 % |      |      |
| S10/S13       |      |      | S11  |               |      |      |      |      |      |
| 1st           | 2nd  | 3rd  | 1st  | 2nd           | 3rd  |      |      |      |      |
| 1st           | 73 % | 27 % | 0 %  | 1st           | 74 % | 26 % | 0 %  |      |      |
| 2nd           | 26 % | 52 % | 21 % | 2nd           | 23 % | 59 % | 19 % |      |      |
| 3rd           | 1 %  | 20 % | 79 % | 3rd           | 3 %  | 15 % | 82 % |      |      |

| S14 |      |      |      | S15 |      |      |      |
|-----|------|------|------|-----|------|------|------|
|     | 1st  | 2nd  | 3rd  |     | 1st  | 2nd  | 3rd  |
| 1st | 74 % | 25 % | 1 %  | 1st | 55 % | 39 % | 6 %  |
| 2nd | 24 % | 50 % | 26 % | 2nd | 39 % | 26 % | 34 % |
| 3rd | 1 %  | 25 % | 74 % | 3rd | 6 %  | 33 % | 61 % |
